# Supplementary material for: Adiposity and lean muscle indices that associate with cardiometabolic risk factors and inflammatory mediators in a South Asian population
Source: Research Square preprint supplement (doi:10.21203/rs.3.rs-6568066/v1), 2025-05-15
Supplement: Supplementary file 1 [file ac24f7b662ff67ef9c104c47.xlsx]

## Sheet: No athletes
	Age	Gender	FBS	T.chol	Triglycerides	HDL	LDL	Apolipoproteins (ng/ml)				Cytokines	Est. VAT Area (cm^2)	Appen. Lean/Height^2 (kg/m^2)	Sarcopenia	FMR	High FMR	Fat mass/height^2 (kg/m^2)	High FMI	VAT mass	Waist
								Apo A1	Apo B	Apo B/A1	Il-6 (pg/ml)	IL-1B (pg/ml)										BMI
GM 205	49	F	81	249	68	51	184	153	128	0.836601	49.9	2.7	91.4	6.15	0	1.12362	0	8.82	0	441	73	22.7
GM 206	50	M	146	247	133	53	167	150	89	0.593333	23.2	3.3	116	7.27	0	1.76643	1	6.22	1	560	77	22.9
GM 207	21	F	82	204	57	49	144	138	73	0.528986	49.9	4.2	59	5.64	0	1.07995	0	7.17	0	285	66	20.1
GM 208	34	M	89	274	86	44	213	132	116	0.878788	173.5	2.7	89.5	6.85	1	1.47216	0	6.66	1	432	79	22
GM 209	39	M	80	263	98	60	183	180	87	0.483333	216.3	3.9	179	7.75	0	2.02188	1	8.88	1	862	94	28
GM 210	59	M	90	143	52	46	86	138	57	0.413043	13.8	2.4	108	6.68	1	1.54593	0	7.19	1	521	80	22.3
GM 211	32	F	84	214	99	32	163	96	85	0.885417	76.1	8.3	117	6.96	0	1.07867	0	12.8	1	565	84	29
GM 212	30	M	94	263	185	36	191	108	96	0.888889	44.2	5	139	8.75	0	1.46388	0	8.84	1	672	90	28
GM 213	36	F	78	218	80	59	143	177	75	0.423729	42.6	3.9	56.8	4.36	1	0.871624	0	8.5	0	274	66	21
GM 214	37	F	95	224	95	44	161	135	78	0.577778	24	2.7	134	5.15	1	1.21718	1	12	1	645	74	25
GM 215	27	F	91	214	39	75	132	225	68	0.302222	25.5	4.5	62	4.79	1	1.08099	0	11	1	299	79	24
GM 216	27	F	81	160	73	48	98	144	61	0.423611	115.7	3	127	5.11	1	1.19275	0	14.1	1	613	84	27
GM 217	28	M	93	178	114	37	119	109	75	0.688073	79.6	1.7	99.1	7.05	0	1.77029	1	8.13	1	478	74	25
GM 218	39	F	85	195	50	59	126	177	64	0.361582	13.8	6.3	88	6.72	0	1.06813	0	10.6	1	424	79	26
GM 219	39	M	75	255	140	35	192	105	88	0.838095	92	6.6	202	8.34	0	1.954	1	10.6	1	973	102	29
GM 220	27	M	91	193	168	23	136	70	95	1.35714	37.8	10.4	178	7.63	0	1.60187	0	13.8	1	858	104	33
GM 221	26	F	84	175	40	52	115	156	67	0.429487	25.5	8.1	46.6	4.27	1	0.85	0	8.65	0	225	61	32
GM 222	22	M	82	151	67	51	96	153	59	0.385621	22.5	5	64.2	6.57	1	0.904615	0	8.36	1	310	82	24
GM 223	28	M	102	223	122	56	142	168	74	0.440476	24	9.7	94.4	6.64	1	1.46185	0	7.2	1	455	80	22
GM 224	46	F	92	177	84	30	130	72	80	1.11111	47.5	5.6	108	5.81	0	1.15951	0	10.2	1	518	88	24
GM 225	57	F	104	153	81	53	84	150	55	0.366667	19.5	4.5	150	4.92	1	1.32867	1	13.3	1	724	82	26
GM 226	53	M	111	201	79	54	131	162	86	0.530864	9	5	135	4.57	1	1.87211	1	12.2	1	652	93	25.2
GM 227	37	M	83	233	135	38	168	114	92	0.807018	91.1	8.1	102	8.54	0	1.70779	1	7.62	1	494	98	26.2
GM 228	27	F	86	172	44	39	124	117	50	0.42735	41	7.3	129	6.06	0	1.29161	1	14.4	1	624	86	28
GM 230	22	M	89	217	96	34	164	102	90	0.882353	12.4	3	102	6.38	1	1.27356	0	9.98	1	489	72	24
GM 231	31	F	87	158	75	38	105	96	73	0.760417	13.1	5.3	128	7.45	0	0.895229	0	13.6	1	616	74	30
GM 232	29	M	97	242	212	26	174	78	110	1.41026	33.9	3.3	127	7.84	0	1.504	0	9.35	1	614	90	27
GM 233	31	F	94	229	131	37	165	99	90	0.909091	10.4	3	69.5	4.42	1	1.26081	1	8.63	0	335	72	20
GM 235	31	F	80	158	216	46	106	140	75	0.535714	14.5	2.4	61.5	5.63	0	1.19956	1	7.69	0	297	74	22
GM 236	43	F	85	205	28	101	90	290	50	0.172414	22.5	5	70.7	4.72	1	0.928458	0	8.39	0	341	74	20.6
GM 237	27	M	80	128	71	56	60	162	40	0.246914	15.2	3	63.9	6.04	1	1.19101	0	4.56	0	308	80	19
GM 238	31	M	94	195	61	27	142	80	76	0.95	13.8	3.9	125	6.29	1	1.40307	0	8.15	1	603	88	22
GM 239	30	M	99	224	132	34	140	102	75	0.735294	21.7	2.7	173	5.65	1	2.1149	1	8.01	1	833	92	22
GM 240	28	M	79	239	247	31	174	90	115	1.27778	33.9	4.2	205	8.72	0	1.44308	0	15.4	1	987	116	36
GM 241	26	M	88	195	169	36	135	100	87	0.87	17.4	1.3	110	7.31	0	2.01014	1	8.21	1	529	91	25
GM 242	37	M	84	208	119	41	147	126	78	0.619048	40.2	5.3	196	6	1	1.87221	1	9.79	1	945	98	24
GM 243	43	M	86	178	99	56	102	170	70	0.411765	41	3	102	6.8	1	1.76055	1	6.23	1	491	88	22.1
GM 244	40	M	92	196	97	30	153	90	104	1.15556	22.5	4.8	93.8	6.91	1	1.59109	0	5.24	0	452	86	21.7
GM 245	22	F	86	204	67	41	135	112	92	0.821429	18.1	2.7	68.9	4.49	1	1.23695	1	10.7	1	332	70	23
GM 246	38	M	85	198	137	47	136	126	95	0.753968	12.4	3.9	116	6.95	1	1.78249	1	8.26	1	561	93	24
GM 247	29	M	89	189	76	56	118	168	68	0.404762	13.1	3.9	63.7	5.27	1	0.897532	0	5.58	0	307	74	18
GM 248	35	M	88	148	76	40	91	119	70	0.588235	24	2.4	154	6.5	1	1.53843	0	10.7	1	744	89	26
GM 249	37	M	116	221	86	41	150	123	101	0.821138	13.1	3	181	6.72	1	1.82025	1	11.4	1	872	99	27
GM 250	50	M	86	156	150	37	110	111	83	0.747748	15.2	5	58.6	6.49	1	0.907947	0	4.46	0	283	71	19
GM 251	53	M	86	219	42	45	153	120	120	1	106.5	7.6	166	6.88	1	4.60152	1	7.3	1	799	91	23
GM 252	45	M	109	247	103	27	180	81	135	1.66667	45.8	5.6	221	7.09	0	1.49322	0	10.8	1	1065	106	28
GM 253	46	M	91	130	199	37	68	115	69	0.6	24.7	4.2	218	6.79	1	2.01971	1	10.2	1	1053	99	26
GM 254	48	F	95	157	124	44	91	135	72	0.533333	27	3.6	123	5.17	1	1.5255	1	9.81	1	593	81	22
GM 257	43	M	137	246	107	37	181	110	140	1.27273	29.3	4.2	231	7.48	0	2.0313	1	9.97	1	1113	103	28
GM 258	41	F	85	172	117	47	112	120	75	0.625	11.1	5.3	74.6	4.67	1	1.23509	1	9.43	1	360	80	22
GM 259	40	F	90	190	65	62	107	186	73	0.392473	54	6.6	125	4.85	1	1.68751	1	10.5	1	602	86	22
GM 260	47	M	91	186	143	41	130	130	85	0.653846	47.5	6.3	169	5.19	1	1.24041	0	10.6	1	814	96	23
GM 261	48	M	90	202	63	41	134	111	89	0.801802	15.9	3.6	115	6.71	1	1.49493	0	6.9	1	553	92	23
GM 262	53	F	104	203	103	61	124	175	75	0.428571	15.9	1.7	137	5.21	1	1.3991	1	10.4	1	661	89	23
GM 264	42	F	109	260	75	53	189	150	130	0.866667	20.3	2.7	158	5.74	0	1.26053	1	11.5	1	761	99	25
GM 265	51	F	96	176	136	40	112	110	75	0.681818	13.8	2.4	123	5.38	1	1.51215	1	12.4	1	594	88	26
GM 266	26	M	88	175	88	35	122	105	81	0.771429	13.8	9	70.9	6.39	1	1.14659	0	5.27	0	342	88	20
GM 267	50	M	107	144	205	47	81	143	68	0.475524	18.1	8.1	156	7.53	0	1.90593	1	9.69	1	751	96	29
GM 269	52	M	97	241	91	45	173	130	112	0.861538	30	6.8	97	6.81	1	1.56935	0	6.3	1	468	84	22
GM 270	49	F	85	235	119	60	161	165	98	0.593939	18.8	3.3	62.9	4.48	1	1.26397	1	7.57	0	303	71	19
GM 271	49	M	108	281	93	32	184	90	120	1.33333	12.4	6.6	182	7.62	0	1.62423	0	9.6	1	878	97	27
GM 273	33	M	104	166	81	36	111	109	72	0.66055	15.9	2.1	184	7.04	0	1.9207	1	10.7	1	885	93	26
GM 275	50	F	89	167	98	64	88	190	49	0.257895	15.2	4.2	64.2	4.53	1	0.916958	0	7.95	0	309	74	20
GM 276	52	M	190	174	114	35	121	105	89	0.847619	27	5.3	55.7	5.77	1	1.68666	0	4.14	0	269	76	18
GM 277	49	F	99	194	69	46	131	129	80	0.620155	16.7	5.8	143	6.38	0	1.3068	1	12.3	1	688	91	27
GM 278	49	M	124	150	328	37	90	111	77	0.693694	12.4	3.6	151	7.06	0	1.63557	0	7.71	1	728	106	24
GM 279	51	F	95	212	72	63	128	180	83	0.461111	12.4	6.6	94.2	4.83	1	1.29155	1	9.53	1	454	70	22
GM 280	42	F	97	240	96	51	160	140	103	0.735714	14.5	4.2	138	5.93	0	1.30306	1	11.5	1	663	84	26
GM 281	44	M	88	198	156	29	129	83	80	0.963855	8.4	2.7	128	7.47	0	1.73493	1	6.8	1	617	91	24
GM 282	49	M	119	215	73	39	150	116	95	0.818966	6.02	4.19	255	8.67	0	2.48778	1	11	1	1230	104	31
GM 283	48	M	79	222	91	42	164	121	118	0.975207	10.52	1.72	119	6.99	1	1.68968	0	6.88	1	572	89	23
GM 284	34	M	90	180	86	36	114	104	97	0.932692	13.44	5.83	120	6.17	1	1.46886	0	8.07	1	576	57	22
GM 285	46	M	103	126	118	53	54	150	65	0.433333	14.89	3.01	186	6.77	1	1.56604	0	9.56	1	899	96	25
GM 286	56	M	107	222	107	71	128	200	89	0.445	1.17	3.01	147	5.89	1	1.4764	0	7.64	1	708	91	22
GM 287	59	M	95	193	142	60	115	173	85	0.491329	6.53	4.75	224	6.22	1	1.37921	0	16.9	1	1081	95	31
GM 288	32	F	92	203	200	37	142	112	138	1.23214	12.48	13.5	95.7	5.24	1	1.42822	1	8.52	0	461	78	22
GM 289	52	M	80	235	126	44	163	120	151	1.25833	3.4	2.39	97.4	6.82	1	1.89915	1	5.23	0	470	88	21
GM 290	40	F	89	212	81	58	139	160	99	0.61875	2.86	3.01	107	5.8	0	2.33617	1	12.7	1	517	83	27
GM 291	46	M	149	224	153	49	157	135	122	0.903704	6.02	0.08	151	7.25	0	1.90777	1	7.6	1	726	90	23.5
GM 292	38	M	85	221	94	40	158	119	127	1.06723	22.47	3.01	100	6.12	1	1.65251	0	7.21	1	483	79	20.6
GM 293	44	F	89	197	114	41	137	123	100	0.813008	5.5	2.39	89.2	5.54	0	1.33999	1	9.07	1	430	78	22
GM 294	39	F	79	180	87	67	98	170	69	0.405882	4.46	1.72	120	6.2	0	1.07939	0	10.6	1	579	74	25
GM 295	43	M	90	172	118	36	117	103	103	1	2.31	4.19	151	8.75	0	1.65251	0	9.56	1	727	95	29
GM 296	42	F	85	213	138	34	159	102	130	1.27451	2.86	5.3	120	4.95	1	1.69464	1	9.74	1	577	81	22
GM 297	40	M	87	201	71	57	133	160	102	0.6375	2.86	3.61	38.7	7.1	1	1.8	1	15.8	1	187	59	14
GM 300	35	M	84	197	85	41	138	120	102	0.85	4.99	3.01	116	6.8	1	1.76077	1	8.27	1	559	82	24
GM 304	29	M	87	191	115	33	136	92	103	1.11957	13.44	3.61	142	8.77	0	1.61857	0	9.96	1	684	96	29
GM 305	28	M	78	227	93	46	161	133	129	0.969925	7.04	4.19	142	5.23	1	1.40394	0	14.4	1	686	83	28
GM 308	35	M	102	215	73	42	129	126	109	0.865079	3.93	4.75	125	7.34	0	1.64233	0	8.97	1	595	92	26
GM 309	28	F	94	233	92	32	183	97	130	1.34021	4.99	3.61	37.1	4.23	1	1.03059	0	4.99	0	179	63	16.2
GM 310	28	M	102	201	96	36	144	99	109	1.10101	11.5	3.61	157	6.22	1	1.56993	0	10.3	1	755	95	24
GM 311	21	M	91	189	54	29	142	87	110	1.26437	8.04	4.75	78.5	6.71	1	1.35594	0	7.1	1	379	85	23
GM 315	46	M	99	295	56	56	220	159	175	1.10063	12.48	4.75	99.6	6.17	1	1.30309	0	6.58	1	480	86	20
GM 316	34	M	93	274	158	44	199	132	175	1.32576	12.48	5.83	174	7.67	0	1.85451	1	12.6	1	837	105	30
GM 317	21	F	87	167	92	40	100	120	96	0.8	11.99	2.39	109	5.1	1	1.26368	1	10.4	1	525	74	24
GM 318	34	F	85	150	124	48	94	135	79	0.585185	8.04	3.01	71.1	6.21	0	1.17617	0	8.64	0	343	70	23.1
GM 319	35	M	86	207	135	63	128	173	99	0.572254	12.48	5.83	125	7.67	0	1.48166	0	10.2	1	602	93	27.3
GM 320	25	F	82	232	37	79	136	200	93	0.465	2.31	0.08	87.6	4.47	1	1.33519	1	10.5	1	422	74	22
GM 321	23	F	86	243	110	67	162	170	148	0.870588	7.54	3.61	97.3	4.91	1	1.2495	1	11	1	469	76	23
GM 322	28	F	90	183	100	82	91	246	72	0.292683	4.99	8.87	33	4.25	1	1.00946	0	6.04	0	159	63	17
GM 323	27	M	99	237	74	79	146	300	65	0.216667			127	6.39	1	1.3	0	10.8	1	614	77.5	21.6
GM 326	42	M	97	294	236	51	217	142	150	1.05634	4.46	2.39	115	7.24	0	1.6725	0	6.55	1	553	86	23
GM 327	32	M	99	184	221	41	131	123	91	0.739837	19.65	1.72	85	6.84	1	1.41878	0	6.46	1	410	80	22.4
GM 329	46	M	89	229	88	51	167	145	130	0.896552	14.41	1	84.6	8.27	0	1.85283	1	6.08	1	408	84	24
GM 330	39	M	88	243	106	41	186	122	164	1.34426	22.47	2.39	163	8.4	0	1.6597	0	9.78	1	788	95	29
GM 331	38	M	85	185	89	51	116	140	89	0.635714	4.99	4.75	121	7.69	0	1.24695	0	9.62	1	586	89	26.9
GM 333	42	M	85	160	95	48	98	129	91	0.705426	4.99	5.3	113	7.66	0	1.47725	0	8.14	1	543	88	26
GM 334	76	M	100	146	159	69	66	185	66	0.356757	3.93	5.83	167	6.13	1	1.37998	0	8.7	1	807	85	23
GM 335	42	M	90	233	130	65	151	195	110	0.564103	7.54	6.36	194	8.45	0	2.15278	1	11.4	1	933	106	29.7
GM 336	41	M	90	211	41	42	117	120	106	0.883333	10.52	12.6	125	7.98	0	1.70551	1	6.1	1	603	87	23
GM 337	55	M	83	242	79	44	181	132	150	1.13636	7.54	3.01	48.5	7.69	0	1.13487	0	4.11	0	234	74	20.7
GM 338	38	M	99	199	87	49	130	139	102	0.733813	23.4	3.61	139	6.87	1	1.77455	1	8.81	1	668	87	24
GM 343	32	M	86	285	70	56	200	168	158	0.940476	0.57	3.61	124	7.26	0	1.58168	0	8.67	1	600	94	24.7
GM 344	30	F	85	231	48	47	167	129	130	1.00775	2.86	4.75	113	5.46	1	1.46284	1	10.7	1	544	81	23
GM 345	42	F	84	247		54	176	162	135	0.833333	1.75	2.39	96.6	4.75	1	1.08895	0	10.1	1	466	73	22
GM 346	54	M	89	203	131	52	136	153	91	0.594771	6.02	2.39	116	7.03	0	1.61023	0	6.23	1	561	84	22.5
GM 347	25	M	96	214	66	49	144	135	103	0.762963	8.54	3.01	143	6.75	1	1.07989	0	13.7	1	690	98	30
GM 348	40	M	108	296	55	58	190	172	145	0.843023	3.4	5.83	149	8.17	1	1.64086	0	12.3	1	721	96	29.4
GM 349	41	F	87	204	80	60	121	160	102	0.6375	8.04	5.3	105	5.18	1	1.30329	1	7.58	0	507	81	24
GM 352	52	M	89	205	89	53	118	150	108	0.72	6.02	2.39	124	7.06	0	1.65305	0	8.72	1	600	86	24.9
GM 353	37	M	191	147	66	51	77	140	84	0.6	10.03	1	148	7.65	0	1.72796	1	10.2	1	714	96	28.4
GM 355	62	M	98	275	53	57	190	125	145	1.16	10.03	8.38	169	5.69	1	1.59709	0	8.13	1	816	85	22
GM 357	62	F	114	201	86	90	95	230	73	0.317391	6.53	4.75	132	4.39	1	2.44484	1	9.56	1	636	81	21
GM 358	60	F	105	287	259	71	202	170	166	0.976471	573.21	4.19	142	4.95	1	2.04957	1	10.5	1	683	83	23
GM 359	31	M	98	261	78	66	177	169	130	0.769231	0.57	3.01	114	6.64	1	1.3074	0	7.88	1	550	84	22.9
GM 360	55	F	91	198	98	74	100	198	78	0.393939	8.04	5.3	98.1	4.99	1	0.911858	0	11.2	1	473	69	24
GM 361	26	F	90	169	142	55	102	163	95	0.582822	30.84	3.01	118	5.81	0	1.10398	0	12.9	1	570	74	26
GM 362	24	M	89	195	83	38	133	99	120	1.21212	29.45	4.19	92.1	5.91	1	1.30819	0	7.34	1	444	77	21
GM 363	26	M	84	216	82	61	136	156	111	0.711538	2.8	5.3	113	7.61	0	1.54503	0	8.82	1	546	91	25
GM 364	27	F	93	230	75	103	117	260	77	0.296154	4.99	8.32	57.5	4.69	1	0.823455	0	8.1	0	277	64	20
GM 365	30	F	94	221	103	78	130	130	77	0.592308	24	5.6	95.1	5.42	1	1.09822	0	13	1	459	81	26
GM 366	41	M	115	182	240	49	108	150	66	0.44	13.8	5.6	151	6.43	1	1.91697	1	7.71	1	728	86	23
GM 367	32	F	80	161	114	90	56			#DIV/0!			77.8	4.29	1	1.36152	1	8.68	0	375	67	20
GM 368	50	F	84	231	169	73	143	205	104	0.507317			96.6	6.42	0	1.10401	0	8.9	0	466	70	23
GM 369	28	M	86	196	95	62	116						135	7.1	0	1.8	1	9.31	1	651	85	26
GM 370	51	M	109	201	141	60	120						154	8.41	0	1.89297	1	10.3	1	742	106	30.2
GM 371	50	M	101	226	78	60	133						187	8.51	0	1.98306	1	7.66	1	903	93	26
GM 372	50	F	87	190	63	62	115						105	6.14	0	1.39321	1	10.5	1	508	82	23.1
GM 373	44	F	86	248	97	82	147						74.5	5.45	1	1.23018	1	8.53	0	359	71	23
					120																	24
					59																	26
					117																	21
					98																	25
					45																	20
					70																	26
					123																	23
					75																	20
					77																	23
					89																	26
					101																	30.2
					162																	26
					65																	23.1
					96																	23
